# Supplementary material for: Controlling bacterial growth and inactivation using thin film-based surface acoustic waves
Source: Royal Society of Chemistry journal article supplement (doi:10.1039/d4lc00285g), 2024-01-01
Supplement: d4lc00285g1.pdf [file d4lc00285g1.pdf]

## Controlling bacterial growth and inactivation using thin film-based surface acoustic waves

Hui Ling Ong,<sup>1</sup> Bruna Martins Dell' Agnese,<sup>2</sup> Yunhong Jiang,<sup>2</sup> Yihao Guo,<sup>3</sup> Jian Zhou,<sup>3</sup> Jikai Zhang,<sup>1</sup> Jingting Luo,<sup>4,1,\*</sup> Ran Tao,<sup>4,1</sup> Meng Zhang,<sup>2</sup> Lynn G. Dover,<sup>2</sup> Darren Smith,<sup>2</sup> Kunyapat Thummavichai,<sup>1</sup> Yogendra Kumar Mishra,<sup>5</sup> Qiang Wu<sup>1</sup>, Yong-Qing Fu<sup>1,\*</sup>

<sup>1</sup> Faculty of Engineering and Environment, Northumbria University, Newcastle upon Tyne, NE1 8ST, UK

<sup>2</sup> Hub of Biotechnology in the Building Environment, Department of Applied Science, Northumbria University, Newcastle upon Tyne, NE1 8ST, UK

<sup>3</sup> College of Mechanical and Vehicle Engineering, Hunan University, Changsha 410082, China

<sup>4</sup> Key Laboratory of Optoelectronic Devices and Systems of Ministry of Education and Guangdong Province, College of Physics and Optoelectronic Engineering, Shenzhen University, Shenzhen, 518060, China

<sup>5</sup> Smart Materials, NanoSYD, Mads Clausen Institute, University of Southern Denmark Alison 2, DK-6400, Sønderborg, Denmark

\*Corresponding authors: Professor Jingting Luo, E-mail: [luojt@szu.edu.cn](mailto:luojt@szu.edu.cn)

Professor Richard Yong-Qing Fu, Email: [Richard.fu@northumbria.ac.uk](mailto:Richard.fu@northumbria.ac.uk)

### Supporting information

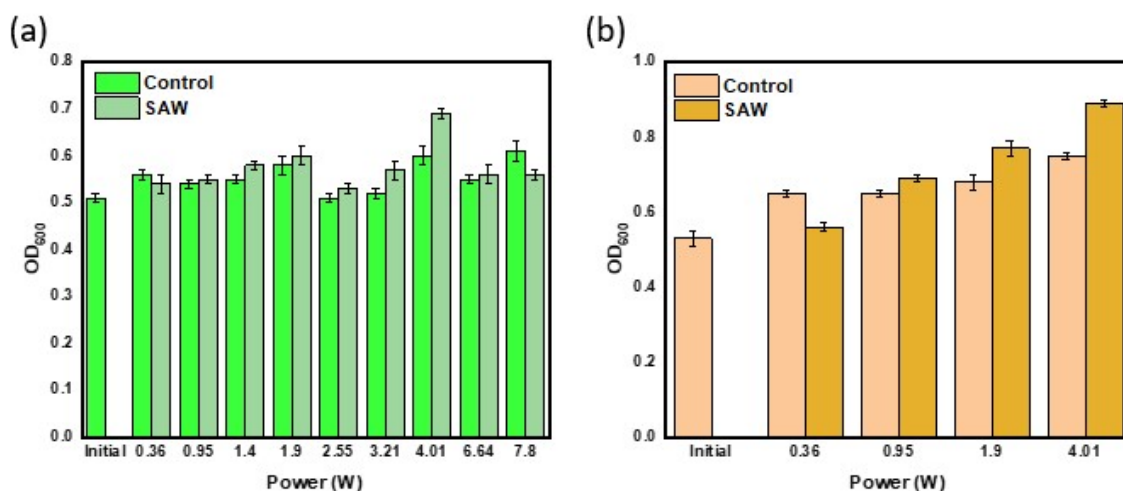

Figure S1: OD measurement results for (a) *E. coli*, (b) *S. aureus*

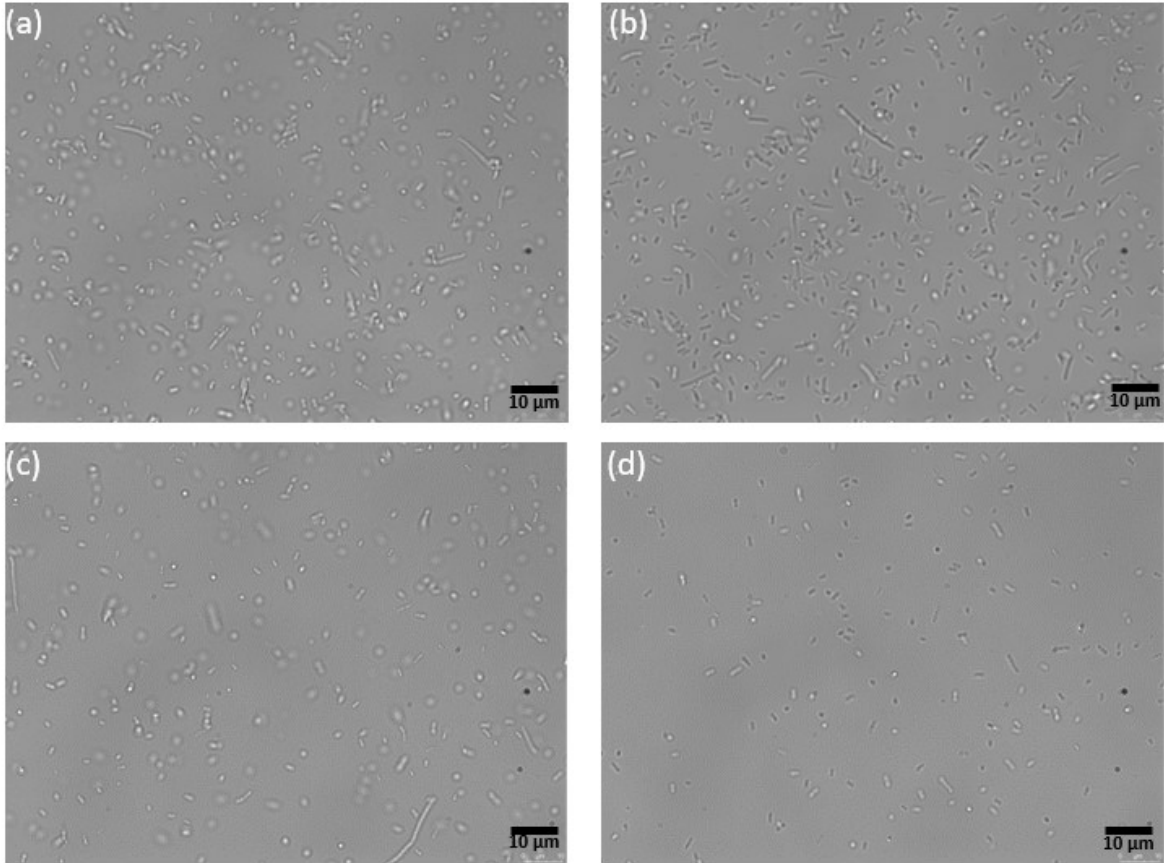

Figure S2: Confocal microscopy images of *E. coli*. (a) Control group for 0.36 W, (b) SAW test group at 0.36 W, (c) Control group for 7.8 W, and (d) SAW test group at 7.8 W
